1  
2  
3  
4  
5  
6  
7  
8  
9  
10  
11  
12  
13  
14  
15  
16  
17  
18  
19  
20  
21  
22  
23  
24  
25  
26  
27  
28  
29  
30  
31  
32  
33  
34  
35  
36  
37

**Correlated individual differences suggest a common mechanism underlying metacognition  
in visual perception and visual short-term memory**

Jason Samaha<sup>1</sup> & Bradley R. Postle<sup>1,2</sup>

<sup>1</sup>University of Wisconsin-Madison, Department of Psychology

<sup>2</sup>University of Wisconsin-Madison, Department of Psychiatry

Correspondence: [jsamaha@wisc.edu](mailto:jsamaha@wisc.edu)

Keywords: Metacognition, Visual perception, Short-term memory, Confidence, Signal detection theory

The Authors declare no conflicts of interest

Acknowledgments: We would like to thank John B. Barrett, Missy Switzky, and Sawyer Cimaroli for help with data collection and two anonymous reviewers for their helpful feedback.

Supported by MH095984 to B.R.P

38  
39  
40  
41  
42  
43  
44  
45  
46  
47  
48  
49  
50  
51  
52  
53  
54  
55  
56  
57  
58  
59  
60  
61

**Abstract**

Adaptive behavior depends on the ability to accurately introspect about one’s own performance. Whether this metacognitive ability is supported by the same mechanisms across different tasks has thus far been investigated with a focus on correlating metacognitive accuracy between perception and long-term memory paradigms. Here, we investigated the relationship between metacognition of visual perception and metacognition of visual short-term memory (VSTM), a cognitive function thought to be more intimately related to visual processing. Experiments 1 and 2 required subjects to estimate the perceived or remembered orientation of a grating stimulus and rate their confidence. We observed strong positive correlations between individual differences in metacognitive accuracy between the two tasks. This relationship was not accounted for by individual differences in task performance or average confidence, and was present across two different metrics of metacognition and in both experiments. A model-based analysis of data from a third experiment showed that a cross-domain correlation only emerged when both tasks shared the same task-relevant stimulus feature. That is, metacognition for perception and VSTM were correlated when both tasks required orientation judgments, but not when the perceptual task was switched to require contrast judgments. In contrast to previous results comparing perception and long-term memory, which have largely provided evidence for domain-specific metacognitive processes, the current findings suggest that metacognition of visual perception and VSTM is supported by a domain-general metacognitive architecture, but only when both domains share the same task-relevant stimulus feature.

## 62 **Introduction**

63 When humans make decisions they are capable of estimating the likelihood that their decision  
64 was accurate. This introspective ability falls under a class of cognitive processes known as  
65 metacognition because it entails cognizing about the quality of a decision-making process (1).  
66 Intuitively, an individual has high metacognitive accuracy if their estimate of the accuracy of  
67 their decision (e.g., as expressed by a confidence rating) corresponds well with the actual  
68 accuracy of their decision (2). Because decisions can be made on the basis of information from a  
69 plethora of sources—for example, deciding on the basis of current sensory input versus deciding  
70 on the basis of information culled from long-term memory—an outstanding question is whether  
71 metacognitive processes are domain-general or domain-specific (3). A domain-general  
72 metacognitive monitoring process would be expected to evaluate the accuracy of decisions made  
73 from both perceptual inputs as well as those based on memory. In contrast, a domain-specific  
74 metacognitive system would use independent neural resources or computations to estimate the  
75 quality of memory- versus perception-based judgments, for example.

76  
77 Recent work on this topic has focused on correlating individual differences in metacognition  
78 during perception and long-term memory and has resulted in mixed findings. Several studies  
79 have reported non-significant relationships between individual's metacognitive ability in a  
80 perceptual task and their metacognitive ability in a long-term memory task (4–6), suggesting  
81 domain-specific metacognition. However, an experiment using similar tasks did find a reliable  
82 positive correlation between metacognitive abilities in both domains (7), and other work has  
83 shown correlated metacognitive performance across different perceptual tasks (8), suggesting  
84 some shared underlying resources. A number of the above-mentioned studies, however, have

85 also reported that structural and function brain imaging data from distinct regions correlated with  
86 metacognitive abilities for the distinct tasks, reinforcing domain-specificity at the neural level  
87 (4,5,7). Additional evidence for domain-specificity between perception and long-term memory  
88 has come from a recent study of patients with lesions to anterior portions of prefrontal cortex.  
89 These patients showed a selective deficit in visual perceptual metacognition, but not memory  
90 metacognition for a recently studied word list (9).

91  
92 A lack of cross-task correlation in metacognition may sometimes be difficult to interpret because  
93 this could result from procedural differences between tasks not necessarily related to the  
94 cognitive construct under investigation (e.g., the use of different stimuli in the perception versus  
95 memory task). Furthermore, perception and long-term memory are themselves quite distinct  
96 cognitive functions (although they can certainly interact in some situations, e.g., (10)), and an  
97 underexplored question is whether perceptual metacognition relates to metacognition for other  
98 cognitive functions more closely related to perception. Across three experiments, we examined  
99 whether metacognition in visual perceptual judgments is related to metacognition for visual  
100 short-term memory (VSTM) judgments using tasks with the same stimuli that differ only in the  
101 requirement for memory storage over a short delay (Experiments 1 and 2), or tasks that differ  
102 also in the relevant stimulus feature (Experiment 3). Because perception of and VSTM for a  
103 given stimulus feature are hypothesized to rely on shared neural representations (11–14), we  
104 might anticipate that metacognition in these domains is also based on some shared resource,  
105 leading to positively correlated individual differences in metacognition across tasks, but only  
106 when the task-relevant stimulus feature is shared.

107

108

109

## 110 **Materials and Methods**

111 **Data availability.** In accordance with the practices of open science and reproducibility, all raw  
112 data and code used in the present analyses are freely available through the Open Science  
113 Framework (<https://osf.io/py38c/>).

114

115 **Experiments 1 and 2.** Because of their similarities, the methods pertaining to Experiment 1 and  
116 2 are described together in this section, followed by the methods for Experiment 3.

117

118 **Participants.** Forty subjects (twenty in Experiment 1: mean age = 21 years,  $SD = 1.67$ , 10  
119 female, and twenty in Experiment 2: mean age = 20.6 years,  $SD = 2.01$ , 14 female) from the  
120 University of Wisconsin-Madison community participated in these experiments and received  
121 monetary compensation. All subjects provided written consent, reported normal or corrected-to-  
122 normal visual acuity and color vision, and were naive to the hypothesis of the experiment. The  
123 University of Wisconsin-Madison Institutional Review Board approved all experiments reported  
124 here.

125

126 **Stimuli.** Target stimuli were identical for both experiments and consisted of sinusoidal  
127 luminance gratings embedded in white noise presented within a central circular aperture (see  
128 Figure 1A). Gratings subtended 2 degrees of visual angle (DVA), had a spatial frequency of 1.5  
129 cycles/DVA and a phase of zero. Fixation (a light gray point, 0.08 DVA) was centered on the  
130 screen and was dimmed slightly to indicate trial start (see Figure 1A). Noise consisted of white

131 noise luminance values generated randomly on each trial for each pixel in the noise patch. The  
132 contrast of the grating was determined for each subject by an adaptive staircase procedure prior  
133 to the main tasks. On a random half of the trials the contrast of both the signal and the noise was  
134 halved. This was not expected to impact orientation estimation performance because the signal-  
135 to-noise ratio of the stimulus was unchanged (15), however it led to a relatively small but reliable  
136 performance difference in Experiment 1 (difference in error =  $1.7^\circ$ ,  $p < 0.001$ ), but not in  
137 Experiment 2 (difference =  $0.15^\circ$ ,  $p = 0.79$ ). This manipulation was not further explored here.  
138 Stimuli were presented on an iMac computer screen (52 cm wide  $\times$  32.5 cm tall;  $1920 \times 1200$   
139 resolution; 60 Hz refresh rate). Subjects viewed the screen from a chin rest at a distance of 62  
140 cm. Stimuli were generated and presented using the MGL toolbox (<http://gru.stanford.edu>)  
141 running in MATLAB 2015b (MathWorks, Natick, MA, USA).

142  
143 **Perceptual task.** To probe each individual's perceptual metacognitive abilities, we employed an  
144 orientation estimation task with confidence ratings (16). On each trial, a target grating was  
145 presented centrally for 33 ms with a randomly determined orientation between  $1$ - $180^\circ$ , followed  
146 shortly (600 ms) by a highly visible probe grating without noise, whose orientation could be  
147 rotated via mouse movement. This short interval between the target and probe was necessary to  
148 ensure that the probe had no visual masking effect. Subjects were instructed to match the  
149 perceived orientation as closely as possible. Subjects pressed the spacebar to input their  
150 orientation response and then used number keys 1-4 to provide a confidence rating. Because  
151 performance in this task varies continuously (as opposed to a binary correct/incorrect outcome)  
152 we instructed subjects to use the confidence scale to indicate how close they think they came to  
153 the true orientation using the scale labels 1 = "complete guess" and 4 = "very close". These

154 perceptual task parameters were the same for both experiments. See Figure 1A for complete trial  
155 timings.

156

157 **VSTM task.** To probe metacognitive abilities for VSTM, we introduced a delay period between  
158 the target and the response probe. In Experiment 1, the delay period was fixed at 7 seconds and  
159 in Experiment 2 it was randomly sampled from the set: 3.45, 6.30, 9.15, or 12.00 seconds. The  
160 stimuli and all other task events were identical to the perceptual task in order to minimize any  
161 differences between tasks that are unrelated to the cognitive manipulation of interest

162

163 **Staircase.** To minimize performance differences across subjects, both experiments began with  
164 100 trials of a 1-up, 3-down adaptive staircase procedure, which classified responses as correct  
165 or incorrect depending on whether they were within 25° of a trial's true orientation. This  
166 procedure aimed to produce ~80% of trials with less than 25° error. The staircase began with the  
167 grating component of the stimulus having a Michelson contrast of 50%, which was then  
168 averaged with a 100% contrast white noise patch. The step size in grating contrast was adapted  
169 according to the PEST algorithm (17), with an initial starting step size of 20% contrast.

170 Procedurally, the staircase task was identical to the perceptual task (described above). The  
171 resulting mean (SEM) contrast of the grating (prior to averaging with noise) was 7.8% (0.47) for  
172 Experiment 1 and 8.5% (0.61) for Experiment 2, and was held constant throughout the rest of  
173 both experiments.

174

175 **Procedure.** For Experiment 1, perceptual and working memory tasks were performed in separate  
176 blocks. Following the staircase, each subject completed one block of 120 trials of the perceptual

177 task, followed by three blocks of 60 trials each of the VSTM task, followed by another block of  
178 the perceptual task. This resulted in a total of 240 perceptual trials and 180 VSTM trials per  
179 subject, completed in a single 1.5 hour session. Experiment 2 differed in that perceptual and  
180 VSTM trials were intermixed within blocks and randomly determined with equal probability to  
181 be either a perceptual trial or one of the four delay periods (between 3.45 - 12 seconds) of the  
182 VSTM task. Intermixing perception and VSTM trials further minimized procedural differences  
183 between tasks by eliminating any task-related expectations (since subjects did not know which  
184 type of trial would come next) and by removing temporal delays between task performance.  
185 Each subject completed 300 trials, separated into 5 blocks, resulting in an average ( $\pm$  SD) of 55.5  
186 (6.4) perceptual trials and 59 (8.0) trials of each delay period of the VSTM task, after removal of  
187 trials based on response times (see below). Total task time was  $\sim$ 1.5 hours.

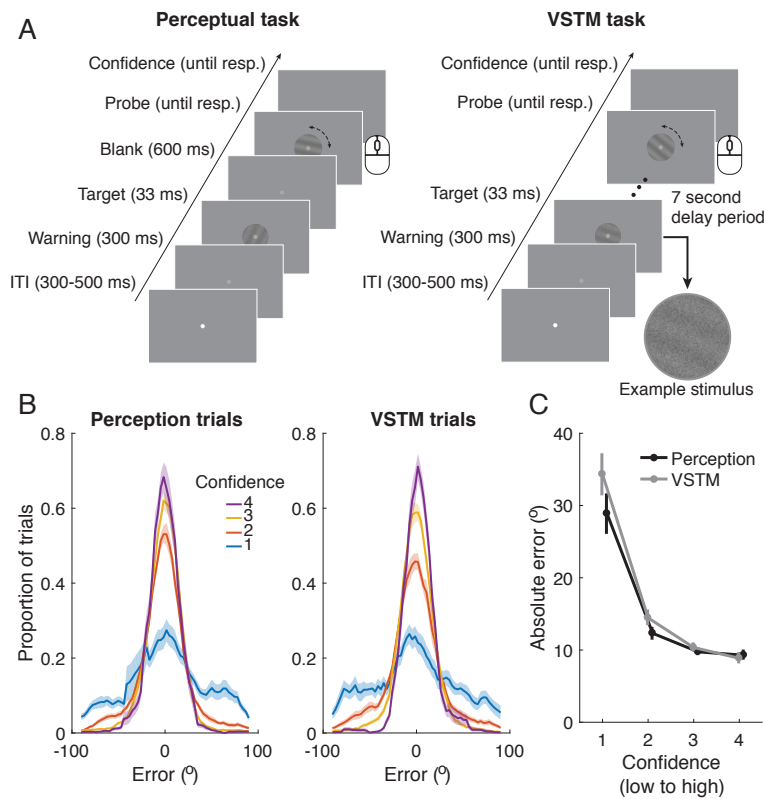

188

189 **Figure 1.** Orientation estimation tasks and confidence-error relationships for Experiment 1. (A)  
190 On each trial of the perception and VSTM task, subjects moved a computer mouse to match the



191 *perceived or remembered orientation and then provided a confidence rating on a 1-4 scale to*  
192 *indicate how close they thought they came to the true orientation where 1 = “complete guess”*  
193 *and 4 = “very close”. The tasks differed only by the addition of a 7 second delay period for the*  
194 *VSTM task. (B) Distributions of responses relative to the true orientation (i.e., error) show a*  
195 *clear scaling with confidence ratings, suggesting that subjective ratings track objective*  
196 *performance at the group level. (C) Median absolute error scales with confidence and VSTM*  
197 *trials produced overall greater error, indicating that representations became noisier when held*  
198 *in VSTM. ITI: inter-trial interval. Shaded bands and error bars denote  $\pm 1$  SEM.*  
199

200 **Quantifying metacognition.** Task performance is measured as error (in degrees) between the  
201 subject’s response and the true orientation on each trial (see Figure 1B). To relate this  
202 continuously varying performance metric to subjective confidence ratings, we computed rank  
203 correlations between each trials’ absolute error and confidence rating to capture how well  
204 confidence tracks performance. Error should decrease with increasing confidence so a subject  
205 with good metacognition would have a stronger negative correlation between confidence and  
206 error than a subject with poor metacognition. Although intuitive, and used elsewhere (18,19),  
207 this metric is potentially influenced by factors not necessarily related to metacognitive accuracy  
208 per se, such as task difficulty and biases in confidence scale use (e.g., under or overconfidence;  
209 (2)). Although we used a staircase procedure to match difficulty, there was still considerable  
210 variability across subjects in median absolute error in both Experiment 1 (range: 8 - 16.5°) and  
211 Experiment 2 (range: 6.9 – 23.3°). A recently introduced measure called meta- $d'/d'$  can correct  
212 for these influences (20), however, meta- $d'/d'$  has been developed only for tasks with discreet  
213 outcomes amenable to signal detection theory analysis (e.g., hits, misses) and cannot be applied  
214 to the continuous estimations tasks we employed in Experiments 1 and 2 (but see Experiment 3).  
215 In order to control for these influences when testing our primary hypothesis about the  
216 relationship between perceptual and VSTM metacognition, we ran two additional multiple  
217 regression models that included covariates for average and task-specific error and confidence

218 (see *Statistics* below). In the case of models with multiple predictors, the relationship between  
219 perceptual and memory metacognition was visualized (Figure 2 and 4) using added variable plots  
220 (MATLAB function *plotAdded.m*), which use the Frisch–Waugh–Lovell theorem to partial out  
221 the effects of other predictors in the model, revealing the effect of a single predictor while all  
222 other predictors are held constant. Predictor  $R^2$  for these models was computed as the sum of  
223 squares for the perceptual metacognition predictor divided by the total sum of squares for all  
224 other predictors and error.

225  
226 Additionally, we verified that the results of this analysis were robust to our particular metric of  
227 metacognition by repeating all analyses using the non-parametric area under the type 2 receiver  
228 operating characteristics curve ( $A_{ROC}$ ; (21–23) as our measure of metacognitive accuracy. This  
229 measure is obtained by taking the area under the curve formed by plotting the type 2 false alarm  
230 rate by the type 2 hit rate at different type 2 criteria. A type 2 false alarm is an incorrect but high  
231 confidence trial and type 2 hit is a correct and high confidence trial and the number of  
232 confidence criteria is the number of ratings on the scale minus 1. At values of 0.5, this metric  
233 indicates that confidence ratings do not discriminate between correct and incorrect trials and  
234 values of 1 indicate perfect discriminability.  $A_{ROC}$  was computed using the method outlined in  
235 (21). Because this metric requires binarizing the data into correct and incorrect responses, we  
236 defined thresholds for each subject based on the 75<sup>th</sup> percentile of their response error  
237 distributions such that a trial with error larger than this threshold was considered incorrect. This  
238 analytically set performance at 75% for each subject, equating accuracy for this analysis. Using a  
239 common threshold of 25° for each subject did not change the statistical significance of any  
240 analyses reported with this metric. Prior to any analysis, trials with response times below 200

241 milliseconds or above the 95<sup>th</sup> percentile of the distribution of response times across all subjects  
242 were excluded. The same trial exclusion procedure was applied to both experiments.

243

244 **Statistics.** We used linear regression to predict individual differences in VSTM metacognition  
245 from variation in perceptual metacognition scores (Figures 2 and 4). In a first, “basic model”, we  
246 considered only these two variables. Then, to control for individual differences in task  
247 performance and confidence ratings, we ran two additional regression models. One included each  
248 subject’s mean error and mean confidence as covariates (3 predictors in total) and the other  
249 included task-specific confidence and error as covariates (i.e., mean perceptual error and  
250 confidence and mean VSTM error and confidence; 5 predictors in total). These three models  
251 were run for each metric of metacognition (r values and  $A_{ROC}$ ; see above) and for both  
252 experiments. To test for linear effects of confidence on error (Figures 1C and 3D) we regressed  
253 single-trial confidence ratings on absolute error for each subject and task and tested the resulting  
254 slopes against zero at the group level using a t-test. To test for performance differences between  
255 tasks we compared median absolute error between the perception and VSTM task with a paired  
256 t-test. We additionally tested for a linear effect of delay period duration in Experiment 2 (Figure  
257 3B) by fitting slopes to each subject’s single-trial absolute error by delay period data and testing  
258 these slopes against zero at the group level with a t-test. All tests were two-tailed.

259

260 **Experiment 3.** This experiment was conducted to test whether the correlation between  
261 perceptual and VSTM metacognition depended on both tasks sharing the same task-relevant  
262 stimulus feature (e.g. orientation). To this end, we compared metacognition in an orientation  
263 perception task and a contrast perception task (Figure 5A) to metacognition in an orientation

264 VSTM task. If the perception of and short-term memory for orientation depend on overlapping  
265 representations (13,14), then individual differences in metacognition may be correlated between  
266 orientation perception and orientation VSTM, but not between contrast perception and  
267 orientation VSTM. Furthermore, we used 2-choice discrimination tasks in Experiment 3 which  
268 are amenable to a recently developed Bayesian hierarchical model-based analysis of  
269 metacognition that controls for individual differences in task performance and confidence biases  
270 while appropriately accounting for variability in individual-subject parameter estimates at the  
271 group level (24).

272

273 **Participants.** Twenty subjects (mean age = 21.8 years,  $SD = 3.18$ , 13 female) from the  
274 University of Wisconsin-Madison community participated in these experiments in exchange for  
275 monetary compensation.

276

277 **Stimuli.** Sinusoidal luminance gratings subtending 2 DVA were centered 1.5 DVA to the right  
278 and/or left of fixation (Figure 5A). As in Experiments 1 and 2, the gratings were averaged with  
279 white noise. The contrast of the grating and the noise components were adjusted for each subject  
280 using a staircase procedure (see below). Stimuli were presented on an iMac computer screen (52  
281 cm wide  $\times$  32.5 cm tall; 1920  $\times$  1200 resolution; 60 Hz refresh rate) and viewed by subjects from  
282 a chin rest 62 cm away. Stimuli were generated and presented using the MGL toolbox  
283 (<http://gru.stanford.edu>) running in MATLAB 2015b (MathWorks, Natick, MA, USA).

284

285 **Contrast perception task.** Subjects were instructed to indicate whether the left or right stimulus  
286 contained a higher contrast grating using the left and right arrow keys, respectively. Subjects

287 then indicated their confidence using number keys 1-4, where 1 denotes a “complete guess” and  
288 4 denotes “very confident”. Subjects were encouraged to use the full range of the scale and were  
289 instructed to understand a number 4 rating as indicating the highest confidence they would feel  
290 in this task, given the difficult nature of the task. This confidence rating procedure was the same  
291 for all three tasks in this experiment. A target and a standard stimulus were presented  
292 simultaneously to the left and right of fixation for 50 ms. The location containing the target was  
293 randomly determined on each trial. Each stimulus also had a randomly and independently  
294 determined orientation that was task irrelevant. Responses could be made as soon as the stimuli  
295 were presented and there was no time limit for responding. The standard stimulus was created by  
296 averaging a 10% Michelson contrast grating with an 80% contrast noise patch and the contrast of  
297 the target grating was adapted for each subject with a staircase procedure (see below).

298  
299 **Orientation perception task.** This task required subjects to indicate whether the two gratings  
300 had the same or different orientation. Both stimuli appeared simultaneously for 50 ms and then  
301 subjects indicated their choice followed by their confidence. On “same” trials, both stimuli had  
302 an identical orientation, which was randomly determined on each trial (between 1 and 180°),  
303 whereas on “different” trials one stimulus was offset by 25° clockwise or counter-clockwise  
304 (randomly determined). Whether a trial was same or different was randomly determined.  
305 Difficulty was controlled by a staircase procedure that adapted the contrast of both stimuli.

306  
307 **Orientation VSTM task.** This task also required that subjects indicate whether two gratings  
308 were the same or different, but here there was a temporal delay of 3 seconds between the first  
309 and second stimulus. Thus, the orientation of the first stimulus must be maintained over the delay

310 in order to perform the task. Each grating was presented for 50 ms and subjects provided their  
311 choice and confidence, with no time pressure, following the second “probe” stimulus. As in the  
312 orientation perception task, both stimuli had an identical randomly determined orientation on  
313 same trials, and a difference in orientation of  $25^\circ$  (clockwise or counter-clockwise) on different  
314 trials. Trial type was randomly determined as was the location (left or right of fixation) of both  
315 stimuli, although the location of both stimuli was always the same for any given trial.

316

317 **Staircase.** Each task began with 60 trials of a 1-up, 3-down staircase procedure, aimed to  
318 converge on ~80% accuracy. During these 60 trials, stimulus contrast was adjusted according to  
319 the PEST algorithm (17), with a starting step size of 8% contrast for all task. For the contrast  
320 perception task, the staircase adapted the contrast of the grating component of the target and  
321 modulated the contrast of the noise component of the target in the opposite direction so that the  
322 overall stimulus contrast always matched the standard (see Figure 5A *left*). For example, if the  
323 contrast of the grating component of the target was +12% relative to the grating component of  
324 the standard then the noise component of the target was reduced by 12%, thereby matching total  
325 stimulus contrast between the target and standard, but producing higher contrast in just the  
326 grating component of the target. Starting contrast of the target grating was +20% relative to the  
327 standard. For the orientation perception and VSTM tasks the starting contrast of the grating  
328 component of each stimulus was 30%, which was averaged with 80% contrast noise. After these  
329 initial PEST trials, a threshold was computed as the mean contrast from the last 4 staircase  
330 reversals. The staircase continued throughout the duration of each task but with a fixed step size  
331 of 0.5% for the contrast task and 0.25% for the orientation tasks, with the starting threshold

332 determined from the initial PEST staircase in the case of the first block of each task, or from the  
333 mean of the last 4 reversals from the most recent block.

334

335 **Procedure.** Each subject completed 3 blocks of 100 trials each for each of the three tasks,  
336 resulting in 300 trials per task (with the exception of one subject who only completed 100 trials  
337 of the contrast perception task). Blocks of the same task were completed sequentially and task  
338 order was randomized. Prior to the start of each new task, subjects completed 60 trials of the  
339 initial PEST staircase corresponding to that task. These 60 trials were not included in any  
340 analysis. Total task time was ~1.5 hours.

341

342 **Model-based analysis of metacognition.** Because Experiment 3 employed 2-choice  
343 discrimination tasks we quantified metacognition in a bias-free signal detection theory model  
344 (20,24). We used an estimate of metacognitive efficiency (M-ratio) that quantifies the extent to  
345 which confidence ratings discriminate between correct and incorrect decisions (i.e., type 2  
346 performance), given the underlying difficulty of the discrimination itself (i.e., type 1  
347 performance), thereby optimally controlling for task difficulty and confidence biases (2). M-ratio  
348 is the ratio between the  $d'$  estimated from the confidence data according to a metacognitively  
349 ideal observer and the actual  $d'$  computed from task performance. Because both metrics are in  
350 the same units, M-ratio will approach 1 if all the information used for the type 1 decision was  
351 also available to the type 2 decision, indicating optimal metacognition. Values below 1 reflect  
352 suboptimal metacognition.

353

354 We used a recently introduced hierarchical modeling approach to estimate the cross-task  
355 correlation between individual differences in M-ratio, as is implemented in the freely available  
356 toolbox HMeta-d (24, <https://github.com/smfleming/HMM>) for MATLAB. This toolbox is a  
357 hierarchical Bayesian extension of Maniscalco and Lau's (20) meta-d' model. The advantage of  
358 a Bayesian model in this context is that the estimation of group-level parameters of interest (i.e.,  
359 M-ratio correlation coefficient across tasks) takes into account parameter uncertainty at the  
360 single subject level. This means that a subject whose M-ratio is estimated with high uncertainty  
361 will contribute less to the group-level parameter estimate than a subject whose M-ratio is  
362 estimated more precisely. In typical maximum likelihood or sum of squares fitting (20), this  
363 knowledge of parameter uncertainty is discarded. Simulations suggest this approach produces  
364 more accurate parameter recovery and lower false positive rates than non-Bayesian alternatives  
365 (24). Cross-task M-ratio correlations were estimated using the HMeta-d function  
366 *fit\_meta\_d\_mcmc\_groupCorr.m*.

367  
368 Posterior distributions of parameters were sampled using Markov-Chain Monte-Carlo methods  
369 (MCMC) implemented in JAGS (<http://mcmc-jags.sourceforge.net>). We ran 3 chains of 20,000  
370 samples each with 5,000 burn-in samples. Each subject's log(M-ratio) for each domain are  
371 specified as draws from a bivariate Gaussian. We used a weakly informative normal prior on  
372 log(M-Ratio) which encompasses estimates from 167 previous subjects (24), and a uniform prior  
373 between -1 and 1 for the correlation coefficient. To assess convergence we ensured that all  
374 MCMC chains were well mixed and that the Gelman and Rubin's  $\hat{R}$  convergence statistics were  
375 between 1 and 1.1. Statistical significance for each correlation was assessed by computing the  
376 proportion of MCMC samples that fell below zero, multiplied by 2 (akin to a two-tailed non-



377 parametric frequentist test) and by computing 95% high-density intervals (HDI) on the  
378 correlation posterior distributions.

379

## 380 **Results**

381 **Experiment 1.** Distributions of response error as a function of confidence are shown in Figure  
382 1B. Absolute error significantly decreased with increasing confidence for both the perceptual  
383 task ( $t(19) = -13.48$ ,  $p < 0.0001$ ) and the VSTM task ( $t(19) = -14.88$ ,  $p < 0.0001$ ), indicating that  
384 subject's confidence reasonably reflected their task performance at the group level (Figure 1C).  
385 Error was also significantly greater in the VSTM task as compared to the perceptual task ( $t(19) =$   
386  $-2.10$ ,  $p = 0.049$ ), reflecting an expected degradation of orientation information when the task  
387 required short-term memory maintenance. Confidence ratings were distributed similarly for  
388 perception and VSTM tasks (Supplementary Figure 1), and average confidence ratings did not  
389 significantly differ between tasks ( $p = 0.15$ ). See Supplementary Figure 2 for a breakdown of  
390 accuracy and response time by block.

391

392 Central to our hypothesis, we found a positive relationship across individuals between perceptual  
393 metacognition and VSTM metacognition (Figure 2). This relationship was observed when using  
394 confidence-error correlations as the measure of metacognition (slope = 0.51,  $t = 2.63$ , predictor  
395  $R^2 = 0.28$ ,  $p = 0.016$ ; Figure 2A) and, importantly, was still present after controlling for average  
396 confidence and error (slope = 0.54,  $t = 2.55$ , predictor  $R^2 = 0.28$ ,  $p = 0.021$ ) and in the model  
397 controlling for task-specific confidence and error (slope = 0.62,  $t = 2.66$ , predictor  $R^2 = 0.29$ ,  $p =$   
398  $0.018$ ). All covariate predictors in both control models were not statistically significant ( $ps >$   
399  $0.30$ ). These results indicate that, although the confidence-error correlation may be influenced by

400 task performance and confidence biases, these factors did not account for the across-subjects  
 401 correlation between perceptual and VSTM metacognition.

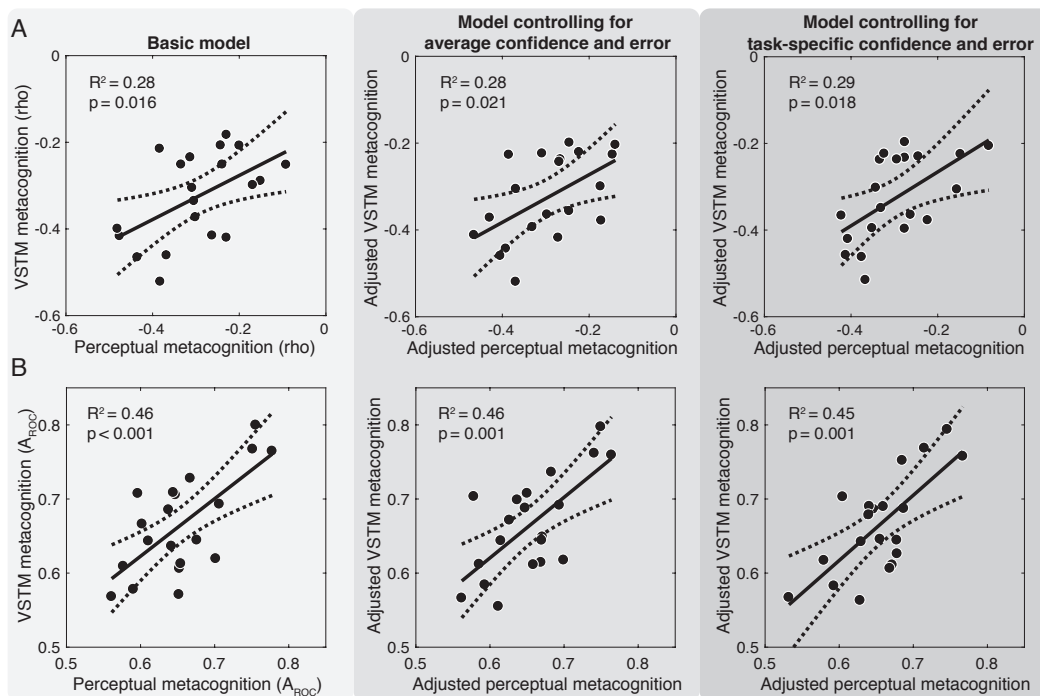

402  
 403 **Figure 2.** Positive relationship between perceptual and VSTM metacognition in Experiment 1.  
 404 (A) Cross-task regression using confidence-error correlations as the metric of metacognition.  
 405 Increasingly complex regression models controlling for task performance and confidence shown  
 406 from left to right (see Methods). (B) Same models as in A, but using the area under the type 2  
 407 ROC curve ( $A_{ROC}$ ) as a measure of metacognitive performance. Dashed lines denoted 95%  
 408 confidence intervals on the linear fit. Black points are individual subjects.  
 409

410 The same relationship was observed when using  $A_{ROC}$  as the metric of metacognition (Figure  
 411 2B). With the basic model, perceptual metacognition significantly predicted VSTM  
 412 metacognition (slope = 0.77,  $t = 3.96$ , predictor  $R^2 = 0.46$ ,  $p = 0.0009$ ). This relationship held  
 413 when controlling for average confidence and error (slope = 0.82,  $t = 3.78$ , predictor  $R^2 = 0.46$ ,  $p$   
 414 = 0.0016) and when controlling for task-specific confidence and error (slope = 0.88,  $t = 3.85$ ,  
 415 predictor  $R^2 = 0.45$ ,  $p = 0.0017$ ). As before, all other covariate predictors across both control  
 416 models were non-significant ( $ps > 0.26$ ). We examined the correlation between all predictor

417 variables in all of our models (Table 1) and found that there was collinearity between several,  
 418 quite expected, covariate predictors (e.g., average confidence predicted average error, perceptual  
 419 confidence predicted VSTM confidence). Importantly, however, there were no significant  
 420 correlations between our predictors of interest (both perceptual metacognitive scores,  $A_{ROC}$  or  
 421 rho) and any other covariate predictors, indicating that task performance and confidence are  
 422 unlikely to be driving the cross-task correlation in metacognition. These results indicate that the  
 423 relationship observed between perceptual and VSTM metacognition was independent of the  
 424 particular metric used and was not accounted for by correlated individual differences in task  
 425 performance or average confidence.

| Predictor – Exp. 1, Exp. 2                | 1     | 2             | 3     | 4             | 5             | 6             | 7            | 8     |
|-------------------------------------------|-------|---------------|-------|---------------|---------------|---------------|--------------|-------|
| 1. Perceptual metacognition (rho)         | -     | -0.13         | -0.03 | -0.16         | -0.04         | -0.10         | -0.01        | X     |
| 2. Average confidence                     | 0.33  | -             | -0.41 | X             | X             | X             | X            | 0.15  |
| 3. Average error                          | 0.01  | <b>-0.54*</b> | -     | X             | X             | X             | X            | 0.01  |
| 4. VSTM confidence (average)              | 0.33  | X             | X     | -             | -0.42         | <b>0.95*</b>  | -0.38        | 0.17  |
| 5. VSTM error (average)                   | 0.08  | X             | X     | <b>-0.54*</b> | -             | -0.42         | <b>0.91*</b> | -0.01 |
| 6. Perceptual confidence (average)        | 0.32  | X             | X     | <b>0.94*</b>  | <b>-0.44*</b> | -             | -0.38        | 0.13  |
| 7. Perceptual error (average)             | -0.05 | X             | X     | <b>-0.53*</b> | <b>0.83*</b>  | <b>-0.53*</b> | -            | 0.03  |
| 8. Perceptual metacognition ( $A_{ROC}$ ) | X     | -0.29         | 0.07  | -0.28         | 0.01          | -0.14         | -0.29        | -     |

426  
 427 **Table 1.** Correlation matrix for every predictor in each model in Experiment 1 and Experiment 2  
 428 (gray regions). X's denote predictor combinations that were not used in any model. Significant  
 429 correlations ( $p < 0.05$ ) are noted in bold and with asterisks.  
 430

431 **Experiment 2.** This experiment served to replicate the cross-task correlation observed in  
 432 Experiment 1 while further minimizing procedural differences between tasks by intermixing  
 433 perceptual and VSTM trials of differing delays (Figure 3A). Error increased monotonically with  
 434 delay duration ( $t(19) = 2.85$ ,  $p = 0.010$ . Figure 3B), and perception trials had lower error than  
 435 VSTM trials, collapsing across delays ( $t(19) = 3.33$ ,  $p = 0.003$ ), indicating the expected loss of  
 436 information in VSTM relative to perception. As in Experiment 1, error decreased with increasing  
 437 confidence during both perception ( $t(19) = -7.56$ ,  $p < 0.0001$ ) and VSTM trials ( $t(19) = -8.99$ ,  $p$

438 < 0.0001), indicating that confidence reliably tracked performance at the group level (Figure 3C  
 439 & 3D). Average confidence was lower on VSTM (mean = 2.59, SEM = 0.133) than on  
 440 perception trials (mean = 2.71, SEM = 0.132;  $t(19) = 2.97$ ,  $p = 0.0077$ ; Supplementary Figure 1).  
 441

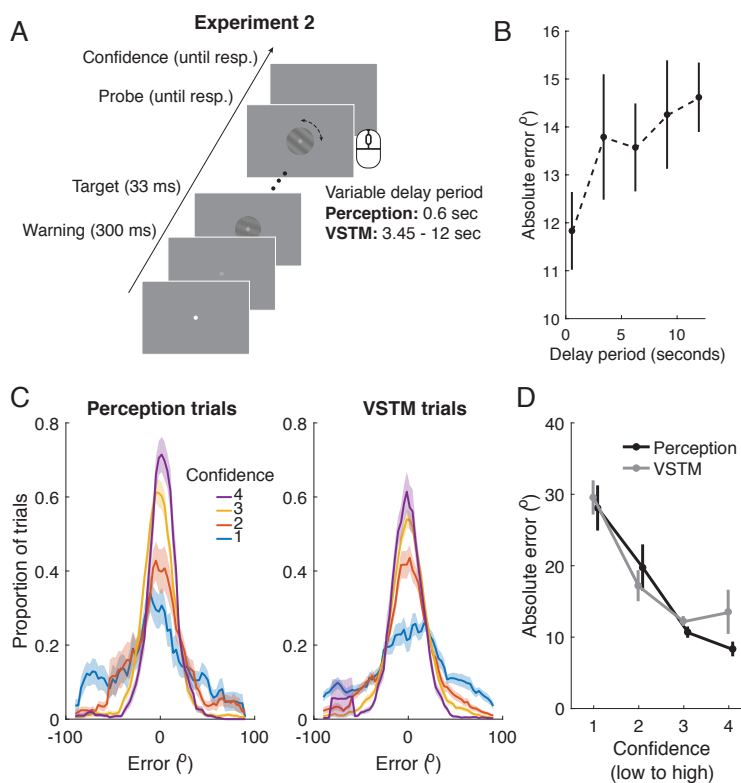

442  
 443 **Figure 3.** Task and behavior for Experiment 2. (A) Perceptual trials (delay 0.6 seconds) and  
 444 VSTM trials (delay between 3.45 and 12 seconds) were intermixed within blocks. (B) Error  
 445 increased with increasing delay length, indicating a loss of information when the orientation  
 446 needed to be maintained in VSTM. (C) Response error distributions show a clear scaling with  
 447 confidence. (D) Error decreased as confidence increased in both perceptual and VSTM trials.  
 448 Shaded bands and error bars indicate  $\pm 1$  SEM.  
 449

450 Importantly, we replicated the positive relationship between perceptual and VSTM  
 451 metacognition with quantitatively better model fits in a new set of subjects. Using confidence-  
 452 error correlations (Figure 4A) perceptual metacognition robustly predicted VSTM metacognition  
 453 in the one-predictor basic model (slope = 0.60,  $t = 5.21$  predictor  $R^2 = 0.60$ ,  $p < 0.0001$ ), the  
 454 three-predictor model controlling for average confidence and error (slope = 0.60,  $t = 4.91$ ,

455 predictor  $R^2 = 0.59$ ,  $p = 0.0001$ ), and in the five-predictor model controlling for task-specific  
 456 confidence and error (slope = 0.59,  $t = 4.44$ , predictor  $R^2 = 0.58$ ,  $p = 0.0005$ . All covariate  
 457 predictors in both control models were non-significant ( $ps > 0.64$ ). As in Experiment 1, some  
 458 covariate predictors were significantly correlated (Table 1; gray region), but no covariates were  
 459 significantly correlated with perceptual metacognition, the predictor of interest. This effect was  
 460 also observed when using  $A_{ROC}$  as the metric of metacognition for the basic model (slope = 0.53,  
 461  $t = 3.88$ , predictor  $R^2 = 0.45$ ,  $p = 0.0011$ ), the three-predictor model (slope = 0.52,  $t = 3.58$ ,  
 462 predictor  $R^2 = 0.44$ ,  $p = 0.002$ ), and the five-predictor model (slope = 0.54,  $t = 3.43$ , predictor  $R^2$   
 463 = 0.44,  $p = 0.004$ ). All covariates in both control models were non-significant ( $ps > 0.52$ ).  
 464

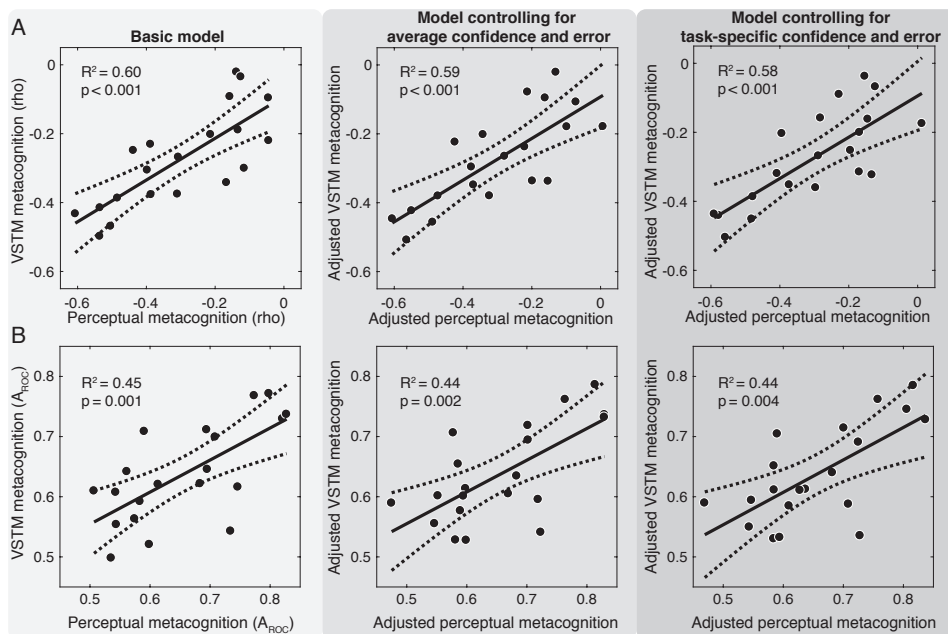

465

466 **Figure 4.** Replication of the positive relationship between perceptual and VSTM metacognition  
 467 in Experiment 2. (A) Same regression models as in Figure 2, indicating the cross-task  
 468 relationship using confidence-error correlations as the metric of metacognition. (B) Same as in  
 469 A, but with  $A_{ROC}$  as the metric of metacognition. Dashed lines denoted 95% confidence intervals  
 470 on the linear fit.  
 471

472 **Experiment 3.** This experiment was conducted to test whether correlated individual differences  
473 in metacognition depended on the perception and VSTM tasks sharing the same task-relevant  
474 stimulus feature (i.e., orientation). Task accuracy (% correct) and metacognitive efficiency (M-  
475 ratio) for each task and subject are shown in Figure 5B. Accuracy was comparable between the  
476 contrast perception task (mean = 78.6%, SEM = 0.012) and the orientation perception task (mean  
477 = 80.4 %, SEM = 0.009;  $p = 0.33$ ), as well as between the contrast perception task and the  
478 orientation VSTM task (mean = 76.5%, SEM = 0.018%,  $p = 0.39$ ), but differed significantly  
479 between the orientation perception and the orientation VSTM tasks ( $t(19) = 2.68$ ,  $p = 0.015$ ).  
480 This is partly because four subjects reached the maximum contrast allowable by the staircase  
481 (25%), so the VSTM task never got easier for them. In general, higher target contrasts were  
482 needed in the VSTM task (mean = 15.5%, SEM = 0.012) compared to both the orientation  
483 perception task (mean = 8.5%, SEM = 0.005;  $t(19) = 6.50$ ,  $p < 0.0001$ ), and the contrast  
484 perception task (mean = 6.2%, SEM = 0.005;  $t(19) = 6.49$ ,  $p < 0.0001$ ), indicating that more  
485 signal was needed in the VSTM task to achieve threshold performance. Metacognitive  
486 efficiency, on the other hand, did not significantly differ between tasks ( $ps > 0.16$ ; see  
487 Supplementary Figure 3 for full posterior distributions of M-ratio for each task, and comparisons  
488 between tasks), and was well below the optimal M-ratio of 1 for all tasks (contrast perception:  
489 mean M-ratio = 0.4, HDI = [0.27, 0.54], orientation perception: mean = 0.44, HDI = [0.30, 0.59],  
490 orientation VSTM: mean = 0.53, HDI = [0.38, 0.68]). Mean confidence (see Supplementary  
491 Figure 1) also did not differ between either of the perceptual tasks and the VSTM task ( $ps >$   
492 0.08), but was significantly lower in the contrast perception task as compared to the orientation  
493 perception task ( $t(19) = 3.06$ ,  $p = 0.006$ ).  
494

495 To our primary question of correlated individual differences in metacognition, we observed a  
496 large positive correlation between metacognitive efficiency in the orientation perception task and  
497 orientation VSTM task (Figure 5C;  $\rho = 0.90$ , HDI = [0.58 0.99],  $p < 0.0001$ ), consistent with  
498 the results of Experiments 1 and 2. However, we did not observe a significant correlation  
499 between metacognition in the contrast perception task and the orientation VSTM task ( $\rho =$   
500  $0.32$ , HDI = [-0.32 0.85],  $p = 0.32$ ), suggesting that the correlation between perception and  
501 VSTM metacognition depends on both tasks sharing the same task-relevant stimulus feature.  
502 Interestingly, metacognition was also not correlated between the two perceptual tasks ( $\rho =$   
503  $0.24$ , HDI = [-0.35 0.76],  $p = 0.42$ ), again underscoring the importance of the similarity of  
504 stimulus feature used. We also computed the difference between these correlation distributions  
505 and found that the correlation between orientation perception and orientation VSTM memory  
506 was significantly larger than the correlation between contrast perception and orientation  
507 perception (HDI = [0.07 1.27],  $p = 0.027$ ) and trending larger than the correlation between  
508 contrast perception and orientation VSTM (HDI = [-0.03 1.24],  $p = 0.063$ ).

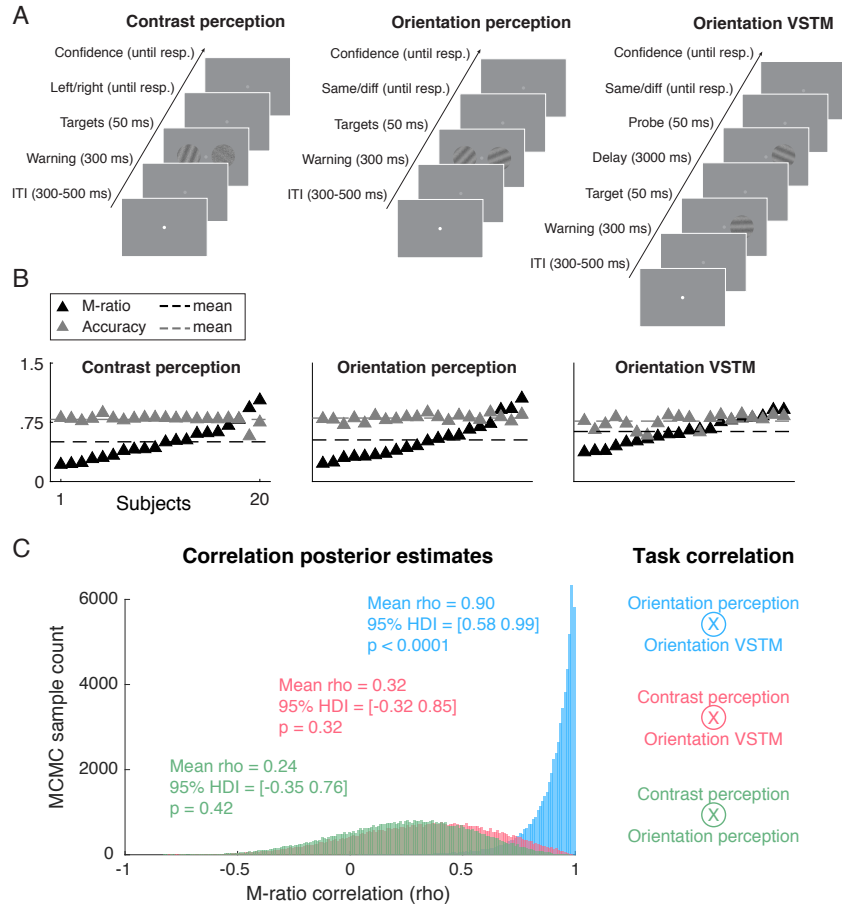

509

510 **Figure 5.** Tasks, behavior, and metacognitive correlations from Experiment 3. (A) To compare  
 511 metacognition across discrimination tasks while varying task and the task-relevant stimulus  
 512 feature, subjects performed 1) a contrast perception task, judging which stimulus contained a  
 513 higher contrast grating, 2) an orientation perception task, judging whether the two stimuli had  
 514 the same orientation, and 3) an orientation VSTM task, judging whether a memorized target  
 515 grating had the same orientation as a probe grating that appeared 3 seconds later. (B)  
 516 Individual subject accuracies (proportion correct) and estimates of metacognitive efficiency (M-  
 517 ratio) for each task. Note that because M-ratio for each subject is estimated in the same model,  
 518 estimates are not fully independent (24). (C) Posterior distributions of cross-task correlations in  
 519 metacognitive efficiency, which reveal a strong positive correlation between orientation  
 520 perception and orientation VSTM metacognition, but not between other tasks.

521

## 522 Discussion

523 Metacognition is an important aspect of decision-making (25,26), learning (27), development  
 524 (28), and perhaps certain aspects of conscious experience (29,30), and can be compromised in  
 525 psychiatric disorders (31–33). It is currently unclear whether an individual with good



526 metacognitive ability in one domain also has good metacognition in other domains. In  
527 Experiment 1, we found that individuals with more accurate metacognition in perceptual  
528 judgments also showed more accurate metacognition in a VSTM task requiring stimulus  
529 maintenance over a 7 second delay period. This relationship was present when using two  
530 different measures of metacognitive performance and regression models controlling for task  
531 performance and mean confidence revealed that this effect was not driven by correlated  
532 individual differences in task performance or confidence biases. We then replicated these  
533 findings in Experiment 2 with a new set of subjects using a task that intermixed perceptual and  
534 VSTM trial types within blocks. Intermixing trial types in Experiment 2 more than doubled the  
535 proportion of variance in VSTM metacognition explained by perceptual metacognition in the  
536 models using error-confidence correlations relative to Experiment 1 when trial types were  
537 blocked (mean increase in  $R^2 = 0.30$ , a factor of  $\sim 2.2$ ), highlighting the importance of  
538 minimizing procedural differences between tasks. A comparable increase across experiments  
539 was not seen, however, when using the AUC metric, which already showed a very large effect  
540 size in both experiments and across all models (mean  $R^2 = 0.45$ , Cohen's  $d = 1.81$ ). In  
541 Experiment 3 we compared an orientation VSTM task to an orientation perceptual task and a  
542 contrast perception task. We again found a large positive correlation ( $R^2 = 0.81$ ) between  
543 metacognition in the orientation VSTM and orientation perception task, but not between the  
544 orientation VSTM and contrast perception task, nor between contrast perception and orientation  
545 perception tasks, highlighting the importance of both tasks sharing the same relevant stimulus  
546 feature. Importantly, given known biases in VSTM metacognitive judgments (34), metacognition  
547 in Experiment 3 was quantified within a signal detection theory model (20,24) that controls for  
548 confidence biases and task performance. Taken together, these results provide the first evidence

549 in humans for a medium-to-high positive correlation between an individual’s metacognitive  
550 abilities in perception and VSTM, when both domains share a common stimulus feature.  
551  
552 The present results contrast with recent experiments examining the relationship between  
553 metacognition of visual perception and long-term memory, which have typically observed no  
554 correlation (4–6; but see 7). We reason that, in contrast to long-term memory, VSTM for a given  
555 stimulus feature is thought to rely on the same neural representations that support perception of  
556 that stimulus feature (11–14), and this may underlie the cross-task correlation in metacognitive  
557 performance. This explanation follows naturally from “first-order” models of metacognition  
558 according to which confidence and task performance are driven by the same internal  
559 representation of stimulus evidence (35–38). For example, in signal detection theoretic models,  
560 the absolute distance of the decision variable from the decision criterion is a proxy for  
561 confidence (39,40). Thus, if perception and VSTM were supported by the same internal  
562 representation of the stimulus, then the computation of confidence across the two tasks would  
563 also be based on the same representations, leading to correlated behavior. “Second-order”  
564 models of metacognition, in contrast, posit an architecture with a secondary confidence read-out  
565 process, which may be influenced by additional sources of noise (41) or other signals not directly  
566 related to the stimulus, such as action-related states (42,43), cortical excitability (44), or arousal  
567 (45,46).  
568  
569 The results of Experiments 1 and 2 are also compatible with second-order models of  
570 metacognition, although several possible relationships between first- and second-order processes  
571 could explain our findings. Shared first-order (sensory) representations across tasks might be

572 enough to produce a behavioral correlation despite separate second-order readout mechanisms.  
573 Alternatively, both first- and second-order processes may be shared across tasks, or only the  
574 second-order process shared, though this latter possibility is unlikely given existing neural  
575 evidence for shared representations in visual regions across perception and VSTM (14,47,48).  
576 The results of Experiment 3, however, provide support for 1st-order models because they suggest  
577 that shared sensory representations underlie the cross-task correlation in metacognition. Because  
578 metacognition was not reliably correlated when tasks differed in their relevant stimulus feature,  
579 even when both tasks were perceptual, this points towards a first-order model of metacognition.  
580 Yet another alternative is that the correlation was dependent on the task structure, for example,  
581 because both orientation tasks involved same/different judgments. This account may also explain  
582 why a previous report comparing metacognition for contrast and orientation judgments in the  
583 context of a visual search paradigm did find correlated individual differences (8), but recent  
584 work comparing a variety of perceptual paradigms with different task structures and stimuli did  
585 not find a correlation (49).  
586  
587 Although the present findings are consistent with a domain-general model of metacognition for  
588 perception and VSTM, correlations at the behavioral level raise further questions about what  
589 specific aspects of metacognitive processing are shared. For example if one's ability to learn  
590 stable confidence criteria over time improves metacognitive accuracy (38), then metacognitive  
591 abilities may be high across domains for an individual with superior learning abilities, perhaps  
592 related to recent work implicating hippocampal myelination in perceptual metacognition (50).  
593 However, this need not imply that the underlying neural substrate responsible for computing the  
594 appropriate levels of confidence is itself domain-general. Similarly, recent work has highlighted

595 specific factors beyond stimulus evidence that modulate confidence, leading to dissociations of  
596 confidence and task performance within an individual (15,51,52). For example, spontaneous  
597 trial-to-trial fluctuations in oscillatory neural activity in the alpha-band (8-13 Hz), which are  
598 thought to reflect visual cortical excitability (53,54), have been shown to bias confidence ratings,  
599 but not objective performance in a visual discrimination task (44). Perhaps a subject who is less  
600 susceptible to such influences from sources not directly related to the difficulty of stimulus  
601 discrimination would show better metacognition across different domains. Future work  
602 examining neural correlates of metacognitive performance across different domains may  
603 contribute in a substantive way to this issue. As an example, McCurdy and colleagues (7)  
604 observed a positive correlation between metacognition of perception and recollection memory at  
605 the behavioral level, but found distinct (as well as overlapping) neural structures whose gray  
606 matter volume related to metacognitive performance in the different tasks. This suggests that  
607 only a portion of the processing stages or computations involved in generating confidence need  
608 be shared across tasks in order to produce a behavioral correlation. Nevertheless, the experiments  
609 reported here provide an important first step for future work by demonstrating a clear correlation  
610 between metacognitive behavior in perception and VSTM.

611

612

613

614

615

616

617

## 618 **References**

- 619 1. Fleming SM, Dolan RJ. The neural basis of metacognitive ability. *Philos Trans R Soc B*  
620 *Biol Sci.* 2012 May 19;367(1594):1338–49.
- 621 2. Fleming SM, Lau HC. How to measure metacognition. *Front Hum Neurosci* [Internet].  
622 2014 [cited 2016 Dec 16];8. Available from:  
623 <http://journal.frontiersin.org/article/10.3389/fnhum.2014.00443/abstract>
- 624 3. Kelemen WL, Frost PJ, Weaver CA. Individual differences in metacognition: Evidence  
625 against a general metacognitive ability. *Mem Cognit.* 2000 Jan 1;28(1):92–107.
- 626 4. Baird B, Cieslak M, Smallwood J, Grafton ST, Schooler JW. Regional White Matter  
627 Variation Associated with Domain-specific Metacognitive Accuracy. *J Cogn Neurosci.*  
628 2015 Mar;27(3):440–52.
- 629 5. Baird B, Smallwood J, Gorgolewski KJ, Margulies DS. Medial and Lateral Networks in  
630 Anterior Prefrontal Cortex Support Metacognitive Ability for Memory and Perception. *J*  
631 *Neurosci.* 2013 Oct 16;33(42):16657–65.
- 632 6. Fitzgerald LM, Arvaneh M, Dockree PM. Domain-specific and domain-general processes  
633 underlying metacognitive judgments. *Conscious Cogn.* 2017 Mar;49:264–77.
- 634 7. McCurdy LY, Maniscalco B, Metcalfe J, Liu KY, de Lange FP de, Lau H. Anatomical  
635 Coupling between Distinct Metacognitive Systems for Memory and Visual Perception. *J*  
636 *Neurosci.* 2013 Jan 30;33(5):1897–906.
- 637 8. Song C, Kanai R, Fleming SM, Weil RS, Schwarzkopf DS, Rees G. Relating inter-  
638 individual differences in metacognitive performance on different perceptual tasks.  
639 *Conscious Cogn.* 2011 Dec;20(4):1787–92.
- 640 9. Fleming SM, Ryu J, Golfinos JG, Blackmon KE. Domain-specific impairment in  
641 metacognitive accuracy following anterior prefrontal lesions. *Brain.* 2014 Aug 6;awu221.
- 642 10. Fan JE, Hutchinson JB, Turk-Browne NB. When past is present: Substitutions of long-term  
643 memory for sensory evidence in perceptual judgments. *J Vis.* 2016 Jun 1;16(8):1.
- 644 11. D’Esposito M, Postle BR. The cognitive neuroscience of working memory. *Annu Rev*  
645 *Psychol.* 2015 Jan 3;66:115–42.
- 646 12. Harrison SA, Tong F. Decoding reveals the contents of visual working memory in early  
647 visual areas. *Nature.* 2009 Apr 2;458(7238):632–5.
- 648 13. Postle BR. Working memory as an emergent property of the mind and brain. *Neuroscience.*  
649 2006 Apr 28;139(1):23–38.
- 650 14. Serences JT, Ester EF, Vogel EK, Awh E. Stimulus-Specific Delay Activity in Human  
651 Primary Visual Cortex. *Psychol Sci.* 2009 Feb;20(2):207–14.

- 652 15. Samaha J, Barrett JJ, Sheldon AD, LaRocque JJ, Postle BR. Dissociating Perceptual  
653 Confidence from Discrimination Accuracy Reveals No Influence of Metacognitive  
654 Awareness on Working Memory. *Conscious Res.* 2016;851.
- 655 16. Rademaker RL, Tredway CH, Tong F. Introspective judgments predict the precision and  
656 likelihood of successful maintenance of visual working memory. *J Vis.* 2012 Dec  
657 21;12(13):21.
- 658 17. Taylor MM, Creelman CD. PEST: Efficient Estimates on Probability Functions. *J Acoust*  
659 *Soc Am.* 1967 Apr 1;41(4A):782–7.
- 660 18. Nelson TO. A comparison of current measures of the accuracy of feeling-of-knowing  
661 predictions. *Psychol Bull.* 1984 Jan;95(1):109–33.
- 662 19. Yokoyama O, Miura N, Watanabe J, Takemoto A, Uchida S, Sugiura M, et al. Right  
663 frontopolar cortex activity correlates with reliability of retrospective rating of confidence in  
664 short-term recognition memory performance. *Neurosci Res.* 2010 Nov;68(3):199–206.
- 665 20. Maniscalco B, Lau H. A signal detection theoretic approach for estimating metacognitive  
666 sensitivity from confidence ratings. *Conscious Cogn.* 2012 Mar;21(1):422–30.
- 667 21. Fleming SM, Weil RS, Nagy Z, Dolan RJ, Rees G. Relating introspective accuracy to  
668 individual differences in brain structure. *Science.* 2010;329(5998):1541–1543.
- 669 22. Galvin SJ, Podd JV, Drga V, Whitmore J. Type 2 tasks in the theory of signal detectability:  
670 Discrimination between correct and incorrect decisions. *Psychon Bull Rev.* 2003 Dec  
671 1;10(4):843–76.
- 672 23. Kornbrot DE. Signal detection theory, the approach of choice: Model-based and  
673 distribution-free measures and evaluation. *Percept Psychophys.* 2006 Apr 1;68(3):393–414.
- 674 24. Fleming SM. HMeta-d: hierarchical Bayesian estimation of metacognitive efficiency from  
675 confidence ratings. *Neurosci Conscious* [Internet]. 2017 Jan 1 [cited 2017 Apr 27];3(1).  
676 Available from: [https://academic.oup.com/nc/article/3/1/nix007/3748261/HMeta-d-](https://academic.oup.com/nc/article/3/1/nix007/3748261/HMeta-d-hierarchical-Bayesian-estimation-of)  
677 [hierarchical-Bayesian-estimation-of](https://academic.oup.com/nc/article/3/1/nix007/3748261/HMeta-d-hierarchical-Bayesian-estimation-of)
- 678 25. Kiani R, Corthell L, Shadlen MN. Choice Certainty Is Informed by Both Evidence and  
679 Decision Time. *Neuron.* 2014 Dec 17;84(6):1329–42.
- 680 26. van den Berg R, Zylberberg A, Kiani R, Shadlen MN, Wolpert DM. Confidence Is the  
681 Bridge between Multi-stage Decisions. *Curr Biol* [Internet]. 2016 [cited 2016 Nov 27];  
682 Available from: <http://www.sciencedirect.com/science/article/pii/S0960982216312064>
- 683 27. Butler AC, Karpicke JD, Roediger III HL. Correcting a metacognitive error: Feedback  
684 increases retention of low-confidence correct responses. *J Exp Psychol Learn Mem Cogn.*  
685 2008;34(4):918–28.

- 686 28. Weil LG, Fleming SM, Dumontheil I, Kilford EJ, Weil RS, Rees G, et al. The development  
687 of metacognitive ability in adolescence. *Conscious Cogn*. 2013 Mar;22(1):264–71.
- 688 29. Lau H, Rosenthal D. Empirical support for higher-order theories of conscious awareness.  
689 *Trends Cogn Sci*. 2011 Aug;15(8):365–73.
- 690 30. Samaha J. How best to study the function of consciousness? *Front Psychol* [Internet]. 2015  
691 [cited 2017 Jan 5];6. Available from:  
692 <http://journal.frontiersin.org/article/10.3389/fpsyg.2015.00604/abstract>
- 693 31. David AS, Bedford N, Wiffen B, Gillean J. Failures of metacognition and lack of insight in  
694 neuropsychiatric disorders. *Philos Trans R Soc Lond B Biol Sci*. 2012 May  
695 19;367(1594):1379–90.
- 696 32. Hauser TU, Allen M, Rees G, Dolan RJ. Metacognitive impairments extend perceptual  
697 decision making weaknesses in compulsivity. *Sci Rep*. 2017 Jul 26;7(1):6614.
- 698 33. Bliksted V, Samuelsen E, Sandberg K, Bibby BM, Overgaard MS. Discriminating between  
699 first- and second-order cognition in first-episode paranoid schizophrenia. *Cognit*  
700 *Neuropsychiatry*. 2017 Mar 4;22(2):95–107.
- 701 34. Adam KCS, Vogel EK. Confident failures: Lapses of working memory reveal a  
702 metacognitive blind spot. *Atten Percept Psychophys*. 2017 Jul 1;79(5):1506–23.
- 703 35. Kepecs A, Uchida N, Zariwala HA, Mainen ZF. Neural correlates, computation and  
704 behavioural impact of decision confidence. *Nature*. 2008 Sep 11;455(7210):227–31.
- 705 36. Kiani R, Shadlen MN. Representation of confidence associated with a decision by neurons  
706 in the parietal cortex. *Science*. 2009 May 8;324(5928):759–64.
- 707 37. Sanders JI, Hangya B, Kepecs A. Signatures of a Statistical Computation in the Human  
708 Sense of Confidence. *Neuron*. 2016 May 4;90(3):499–506.
- 709 38. Treisman M, Faulkner A. The setting and maintenance of criteria representing levels of  
710 confidence. *J Exp Psychol Hum Percept Perform*. 1984;10(1):119–39.
- 711 39. Macmillan NA, Creelman CD. *Detection Theory: A User's Guide*. Psychology Press; 2004.  
712 466 p.
- 713 40. Cartwright D, Festinger L. A quantitative theory of decision. *Psychol Rev*. 1943  
714 Nov;50(6):595–621.
- 715 41. Maniscalco B, Lau H. The signal processing architecture underlying subjective reports of  
716 sensory awareness. *Neurosci Conscious*. 2016 Jan 1;2016(1):niw002.
- 717 42. Fleming SM, Maniscalco B, Ko Y, Amendi N, Ro T, Lau H. Action-Specific Disruption of  
718 Perceptual Confidence. *Psychol Sci*. 2015 Jan;26(1):89–98.



- 719 43. Fleming SM, Daw ND. Self-Evaluation of Decision-Making: A General Bayesian  
720 Framework for Metacognitive Computation. *Psychol Rev.* 2017 Jan;124(1):91–114.
- 721 44. Samaha J, Iemi L, Postle BR. Prestimulus alpha-band power biases visual discrimination  
722 confidence, but not accuracy. *Conscious Cogn.* 2017 Feb 17;
- 723 45. Allen M, Frank D, Schwarzkopf DS, Fardo F, Winston JS, Hauser TU, et al. Unexpected  
724 arousal modulates the influence of sensory noise on confidence. *eLife.* 2016 Oct  
725 25;5:e18103.
- 726 46. Hauser TU, Allen M, Purg N, Moutoussis M, Rees G, Dolan RJ. Noradrenaline blockade  
727 specifically enhances metacognitive performance. *eLife.* 2017 May 10;6:e24901.
- 728 47. Riggall AC, Postle BR. The Relationship between Working Memory Storage and Elevated  
729 Activity as Measured with Functional Magnetic Resonance Imaging. *J Neurosci.* 2012 Sep  
730 19;32(38):12990–8.
- 731 48. Emrich SM, Riggall AC, LaRocque JJ, Postle BR. Distributed Patterns of Activity in  
732 Sensory Cortex Reflect the Precision of Multiple Items Maintained in Visual Short-Term  
733 Memory. *J Neurosci.* 2013 Apr 10;33(15):6516–23.
- 734 49. Ais J, Zylberberg A, Barttfeld P, Sigman M. Individual consistency in the accuracy and  
735 distribution of confidence judgments. *Cognition.* 2016 Jan;146:377–86.
- 736 50. Allen M, Glen JC, Müllensiefen D, Schwarzkopf DS, Fardo F, Frank D, et al.  
737 Metacognitive ability correlates with hippocampal and prefrontal microstructure.  
738 *NeuroImage.* 2017 Apr 1;149:415–23.
- 739 51. Koizumi A, Maniscalco B, Lau H. Does perceptual confidence facilitate cognitive control?  
740 *Atten Percept Psychophys.* 2015 May;77(4):1295–306.
- 741 52. Zylberberg A, Barttfeld P, Sigman M. The construction of confidence in a perceptual  
742 decision. *Front Integr Neurosci* [Internet]. 2012 Sep 21 [cited 2014 Oct 15];6. Available  
743 from: <http://www.ncbi.nlm.nih.gov/pmc/articles/PMC3448113/>
- 744 53. Romei V, Brodbeck V, Michel C, Amedi A, Pascual-Leone A, Thut G. Spontaneous  
745 Fluctuations in Posterior  $\alpha$ -Band EEG Activity Reflect Variability in Excitability of Human  
746 Visual Areas. *Cereb Cortex.* 2008 Sep 1;18(9):2010–8.
- 747 54. Samaha J, Gosses O, Postle BR. Distinct Oscillatory Frequencies Underlie Excitability of  
748 Human Occipital and Parietal Cortex. *J Neurosci.* 2017 Mar 15;37(11):2824–33.
- 749
